# Supplementary material for: Applications of the microphysiology systems database for experimental ADME-Tox and disease models
Source: Royal Society of Chemistry journal article supplement (doi:10.1039/c9lc01047e), 2020-01-01
Supplement: c9lc01047e1.pdf [file c9lc01047e1.pdf]

Copyright 2012-2019 University of Pittsburgh Medical Center

Home / MPS Models

### MPS Models

[Add Model](#)

Show MPS  Show EPA  Show TCTC  Show Unassigned

[Copy](#) [CSV](#) [Print](#) [Column visibility](#)

Search:  Show  entries

| View                 | Edit                 | Model Name                | Center                                            | Base Model      | Organ | Device                                                 | Disease |
|----------------------|----------------------|---------------------------|---------------------------------------------------|-----------------|-------|--------------------------------------------------------|---------|
| <a href="#">View</a> | <a href="#">Edit</a> | 2D Mono-layer Hepatocytes | University of Pittsburgh Drug Discovery Institute |                 | Liver | 96 Well Flat Clear Bottom Black Polystyrene TC-Treated | None    |
| <a href="#">View</a> | <a href="#">Edit</a> | Hepatocyte Suspension     | University of Pittsburgh Drug Discovery Institute |                 | Liver | Eppendorf Tube 1.5 mL                                  | None    |
| <a href="#">View</a> | <a href="#">Edit</a> | Mimetas liver             | University of Pittsburgh Drug Discovery Institute | Liver (Mimetas) | Liver | Mimetas Organoplate                                    | None    |
| <a href="#">View</a> | <a href="#">Edit</a> | Mimetas Liver 2.0         | University of Pittsburgh Drug Discovery Institute | Liver (Mimetas) | Liver | Mimetas Organoplate 400                                | None    |
| <a href="#">View</a> | <a href="#">Edit</a> | LAMPS                     | University of Pittsburgh Drug Discovery Institute | Liver (UPDDI)   | Liver | Nortis Single Chamber                                  | None    |
| <a href="#">View</a> | <a href="#">Edit</a> | SQL-SAL 1.0               | University of Pittsburgh Drug Discovery Institute | Liver (UPDDI)   | Liver | Nortis Single chamber (v0.9)                           | None    |
| <a href="#">View</a> | <a href="#">Edit</a> | SQL-SAL 1.0 CS Rhomb 24uL | University of Pittsburgh Drug Discovery Institute | Liver (UPDDI)   | Liver | Rhombic Chamber Chip 24uL                              | None    |
| <a href="#">View</a> | <a href="#">Edit</a> | SQL-SAL 1.5               | University of Pittsburgh Drug Discovery Institute | Liver (UPDDI)   | Liver | Nortis Single Chamber                                  | None    |
| <a href="#">View</a> | <a href="#">Edit</a> | vLAMPS                    | University of Pittsburgh Drug Discovery Institute | vLiver (UPDDI)  | Liver | Micronit OOC                                           | NAFLD   |

Showing 1 to 9 of 9 entries (filtered from 46 total entries) Previous  Next

**Supplemental Figure S1: Selecting the appropriate MPS experimental model.** The MPS database contains detailed bench ready protocols the user can print to assemble and test compounds in various liver models. In this example, the traditional 2D monolayer culture for toxicity and metabolism testing, the gold standard hepatocyte suspension culture for metabolism, a 4 cell organoid type 3D microfluidic liver system in a 96 well Mimetas® plate suitable for high throughput screening, the a 4 cell supervised/self assembly 3D microfluidic Liver Acinus MicroPhysiology (LAMPS) and the earlier version of the LAMPS called the Sequentially Layered, Self Assembly Liver (SQL-SAL) models, and the Vascularized Liver Acinus MicroPhysiology (vLAMPS) model are choices available to meet user needs. The models vary by cell number, types, organization and complexity for the user to select one appropriate to answer the experimental hypothesis.

The screenshot shows the MPS Adverse Events interface. On the left, a 'Compounds' dropdown menu is open, with 'View Adverse Events' highlighted. A blue arrow points from this menu item to a table of adverse events. The table lists events for Tolcapone and Entacapone, including details like event type, number of reports, normalized reports, estimated usage, organ, and a black box warning icon.

| View                 | Compound   | Event                                | Number of Reports | Normalized # of Reports | Estimated Usage | Organ | Black Box Warning |
|----------------------|------------|--------------------------------------|-------------------|-------------------------|-----------------|-------|-------------------|
| <a href="#">View</a> | TOLCAPONE  | ALANINE AMINOTRANSFERASE INCREASED   | 8                 | 7.85                    | 10,195          | Liver | !                 |
| <a href="#">View</a> | TOLCAPONE  | ASPARTATE AMINOTRANSFERASE INCREASED | 5                 | 4.90                    | 10,195          | Liver | !                 |
| <a href="#">View</a> | TOLCAPONE  | BLOOD BILIRUBIN INCREASED            | 4                 | 3.92                    | 10,195          | Liver | !                 |
| <a href="#">View</a> | TOLCAPONE  | LIVER FUNCTION TEST ABNORMAL         | 4                 | 3.92                    | 10,195          | Liver | !                 |
| <a href="#">View</a> | ENTACAPONE | ASPARTATE AMINOTRANSFERASE INCREASED | 40                | 2.29                    | 174,449         | Liver |                   |
| <a href="#">View</a> | ENTACAPONE | ALANINE AMINOTRANSFERASE INCREASED   | 34                | 1.95                    | 174,449         | Liver |                   |
| <a href="#">View</a> | ENTACAPONE | HEPATIC FUNCTION ABNORMAL            | 25                | 1.43                    | 174,449         | Liver |                   |
| <a href="#">View</a> | ENTACAPONE | GAMMA-GLUTAMYLTRANSFERASE INCREASED  | 20                | 1.15                    | 174,449         | Liver |                   |
| <a href="#">View</a> | ENTACAPONE | LIVER DISORDER                       | 17                | 0.97                    | 174,449         | Liver |                   |

**Supplemental Figure S2: Selecting the appropriate compounds for testing.** Clinical adverse events reporting records are contained within the database. In this example, filters are used to identify compounds with black box warning (!) for liver toxicity, increased incidents of liver enzyme elevations and suitable compounds without liver effects from all reported adverse events found in the FDA Adverse Events Reporting System (**FAERS**) to test in the LAMPS model. The incidents of adverse events found in the FAERS database are 'normalized' to estimated drug use from the CDC database.

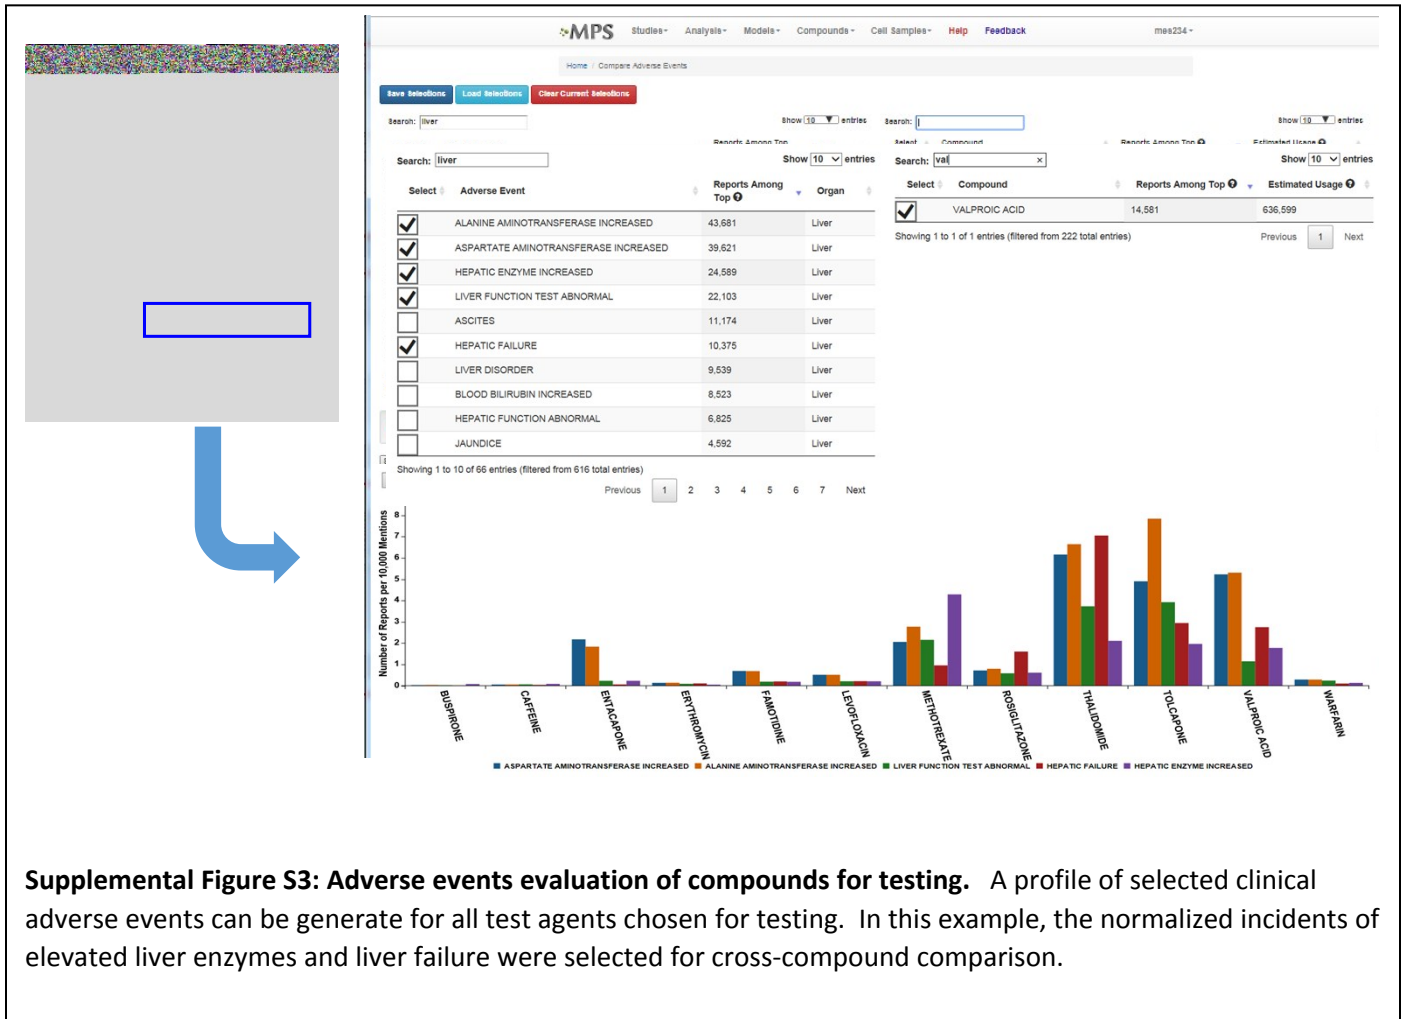

**Supplemental Figure S3: Adverse events evaluation of compounds for testing.** A profile of selected clinical adverse events can be generate for all test agents chosen for testing. In this example, the normalized incidents of elevated liver enzymes and liver failure were selected for cross-compound comparison.

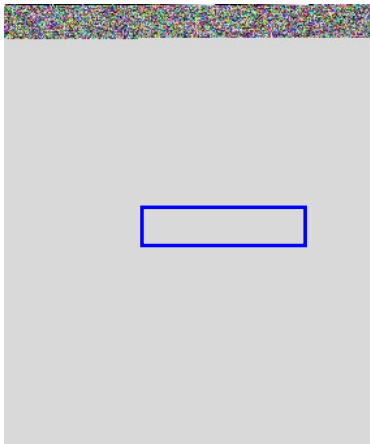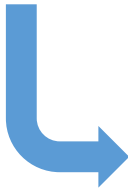

MPS Studies Analysis Models Compounds Cell Samples Help Feedback mes234

Home / Drug Trials

### Drug Trials

Show MPS  Show EPA  Show TCTC  Show Unassigned

Copy CSV Print Column visibility

Search:  Show 50 entries

| View                 | Drug Trial ID | Treatment     | Species | Trial Type | Finding             | Descriptor | +/- | Frequency | Value | Value Units |
|----------------------|---------------|---------------|---------|------------|---------------------|------------|-----|-----------|-------|-------------|
| <a href="#">View</a> | 187           | ACETAMINOPHEN | Human   | Clinical   | Blood :: PK :: Cmax |            | Pos |           | 21.0  | µg/mL       |
| <a href="#">View</a> | 174           | ENTACAPONE    | Human   | Clinical   | Blood :: PK :: Cmax |            | Pos |           | 1.22  | µg/mL       |
| <a href="#">View</a> | 184           | NIMESULIDE    | Human   | Clinical   | Blood :: PK :: Cmax |            | Pos |           | 6.5   | µg/mL       |
| <a href="#">View</a> | 178           | TOLCAPONE     | Human   | Clinical   | Blood :: PK :: Cmax |            | Pos |           | 7.2   | µg/mL       |
| <a href="#">View</a> | 172           | TROGLITAZONE  | Human   | Clinical   | Blood :: PK :: Cmax |            | Pos |           | 2.82  | µg/mL       |
| <a href="#">View</a> | 178           | TOLCAPONE     | Human   | Clinical   | Blood :: PK :: Cmax |            | Pos |           | 7.2   | µg/mL       |
| <a href="#">View</a> | 172           | TROGLITAZONE  | Human   | Clinical   | Blood :: PK :: Cmax |            | Pos |           | 2.82  | µg/mL       |

Funded by the National Center for Advancing Translational Sciences Tissue Chips Program, the National Center for Advancing Translational Sciences Tissue Chip Testing Centers Program, and in part by the Vanderbilt-Pittsburgh Resource for Organotypic Models for Predictive Toxicology

Contribute on Github

**Supplemental Figure S4: Selecting the appropriate testing concentration.** A list of compound Cmax values can be generated in the database to guide test agent concentration for testing.

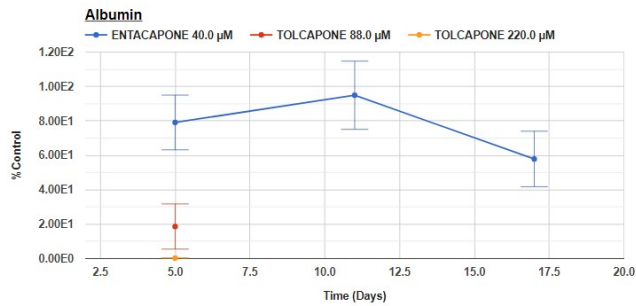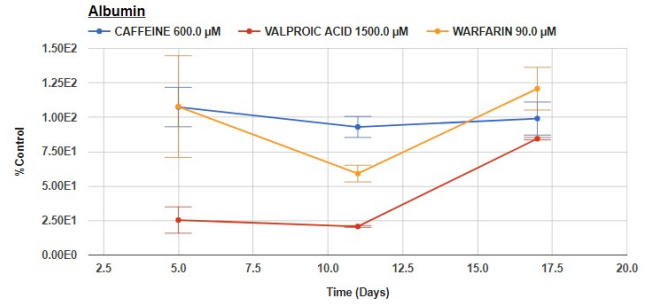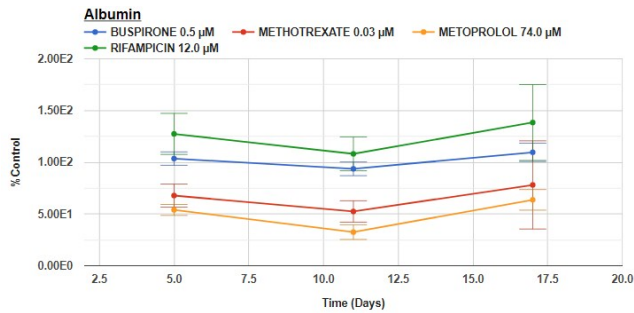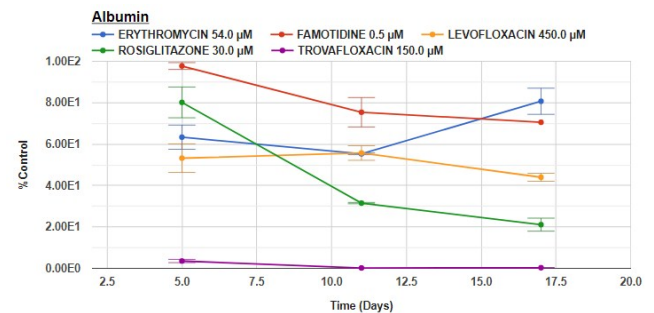

**Supplemental Figure S5. Albumin data from 14 compounds.** Data are measured as ng/ml and normalized to percent of the control response in efflux media collected on Days 5, 11 and 17. The MPS experimental models in duplicate or triplicate devices were treated 18 consecutive days by continuous perfusion flow to entacapone (40 μM); tolcapone (88 μM), tolcapone (220 μM); caffeine (600 μM); Valproic Acid (1500 μM); Warfarin (90 μM); Buspirone (0.5 μM); Methotrexate (0.03 μM); Rifampicin (12 μM); Erythromycin (54 μM); Famotidine (0.5 μM); Levofloxacin (600 μM); Rosiglitazone (30 μM) or Trovafloxacin (200 μM).

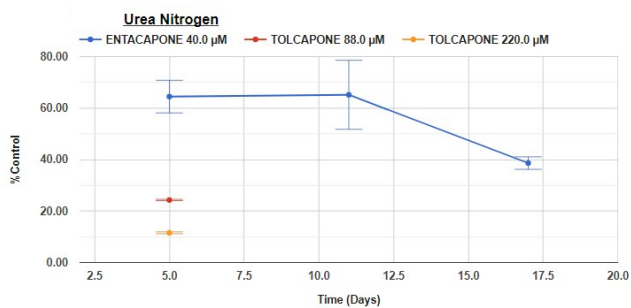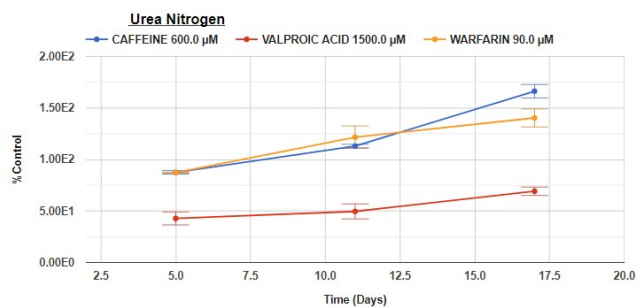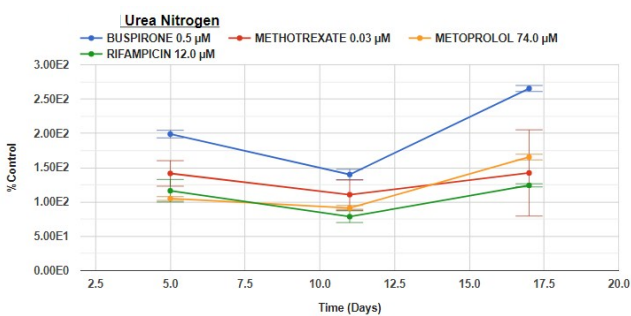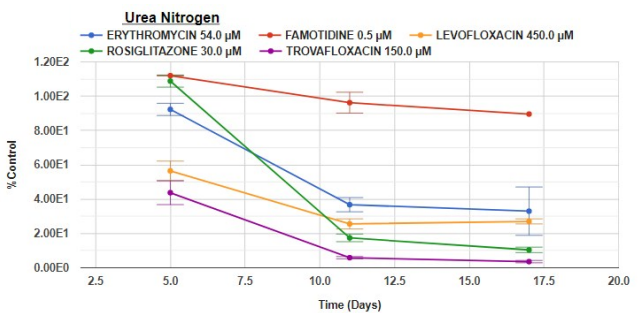

**Supplemental Figure S6. BUN data from 14 compounds.** Data are measured as ng/ml and normalized to percent of the control response in efflux media collected on Days 5, 11 and 17. The MPS experimental models in duplicate or triplicate devices were treated 18 consecutive days by continuous perfusion flow to entacapone (40 μM); tolcapone (88 μM), tolcapone (220 μM); caffeine (600 μM); Valproic Acid (1500 μM); Warfarin (90 μM); Buspirone (0.5 μM); Methotrexate (0.03 μM); Rifampicin (12 μM); Erythromycin (54 μM); Famotidine (0.5 μM); Levofloxacin (600 μM); Rosiglitazone (30 μM) or Trovafloxacin (200 μM).

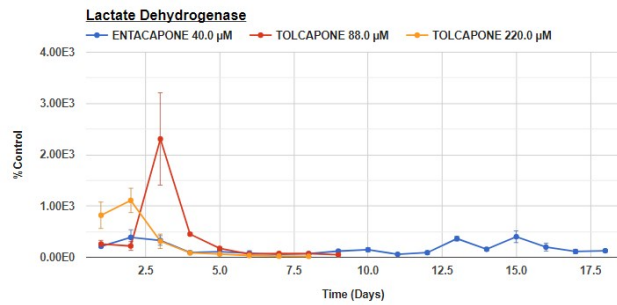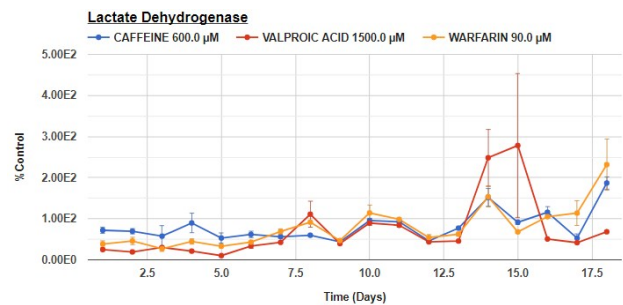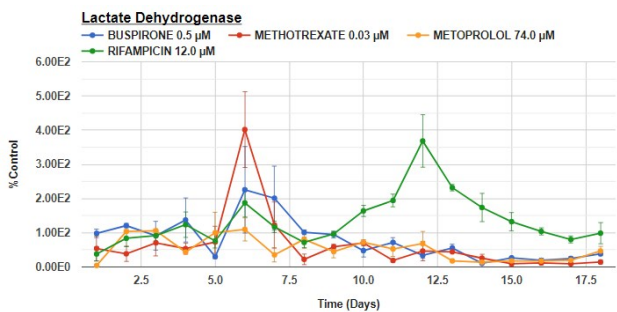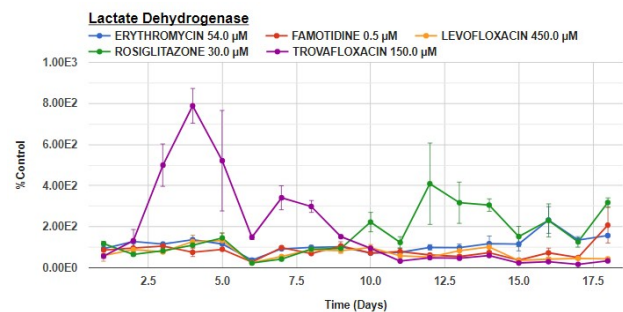

**Supplemental Figure S7. LDH data from 14 compounds.** Data are measured as ng/ml and normalized to percent of the control response in efflux media collected on Days 1 - 18. The MPS experimental models in duplicate or triplicate devices were treated 18 consecutive days by continuous perfusion flow to entacapone (40  $\mu\text{M}$ ); tolcapone (88  $\mu\text{M}$ ), tolcapone (220  $\mu\text{M}$ ); caffeine (600  $\mu\text{M}$ ); Valproic Acid (1500  $\mu\text{M}$ ); Warfarin (90  $\mu\text{M}$ ); Buspirone (0.5  $\mu\text{M}$ ); Methotrexate (0.03  $\mu\text{M}$ ); Rifampicin (12  $\mu\text{M}$ ); Erythromycin (54  $\mu\text{M}$ ); Famotidine (0.5  $\mu\text{M}$ ); Levofloxacin (600  $\mu\text{M}$ ); Rosiglitazone (30  $\mu\text{M}$ ) or Trovafloxacin (200  $\mu\text{M}$ ).

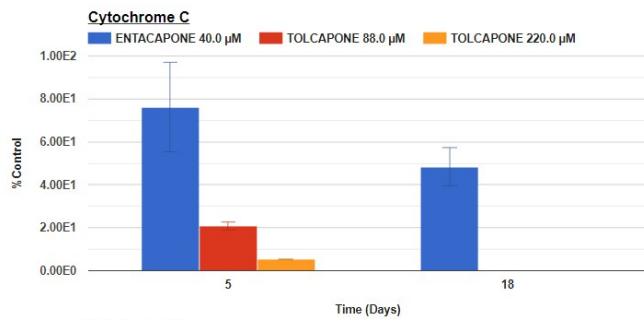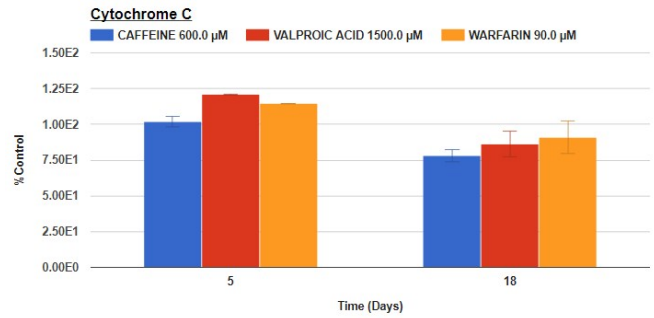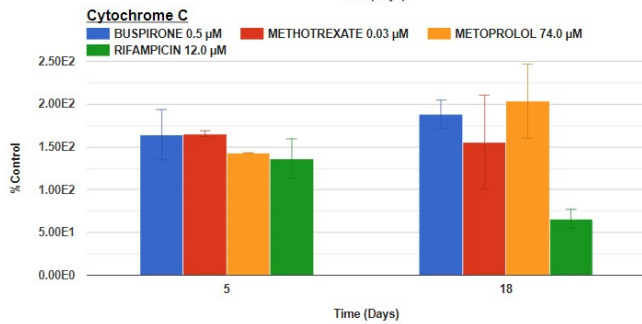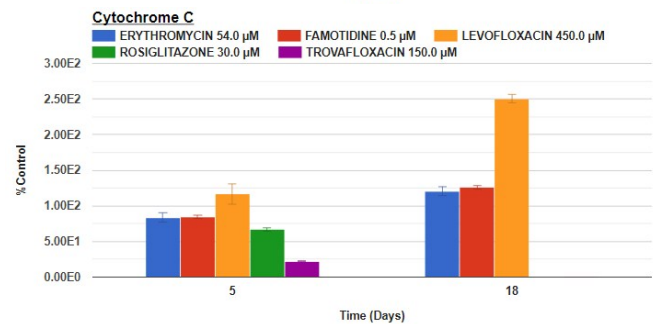

**Supplemental Figure S8. Cytochrome C data from 14 compounds.** A High Content Analysis instrument was used to measure fluorescent intensity on Days 5 and 18 of the mitochondria located Cytochrome C GFP biosensor. The data was normalized to control levels. The MPS experimental models in duplicate or triplicate devices were treated 18 consecutive days by continuous perfusion flow to entacapone (40  $\mu\text{M}$ ); tolcapone (88  $\mu\text{M}$ ), tolcapone (220  $\mu\text{M}$ ); caffeine (600  $\mu\text{M}$ ); Valproic Acid (1500  $\mu\text{M}$ ); Warfarin (90  $\mu\text{M}$ ); Buspirone (0.5  $\mu\text{M}$ ); Methotrexate (0.03  $\mu\text{M}$ ); Rifampicin (12  $\mu\text{M}$ ); Erythromycin (54  $\mu\text{M}$ ); Famotidine (0.5  $\mu\text{M}$ ); Levofloxacin (600  $\mu\text{M}$ ); Rosiglitazone (30  $\mu\text{M}$ ) or Trovafloxacin (200  $\mu\text{M}$ ).



**Test Compounds ranked by cumulative incidents of adverse responses in LAMPS**

**Test Compounds ranked by frequency of clinical abnormal liver function tests\***

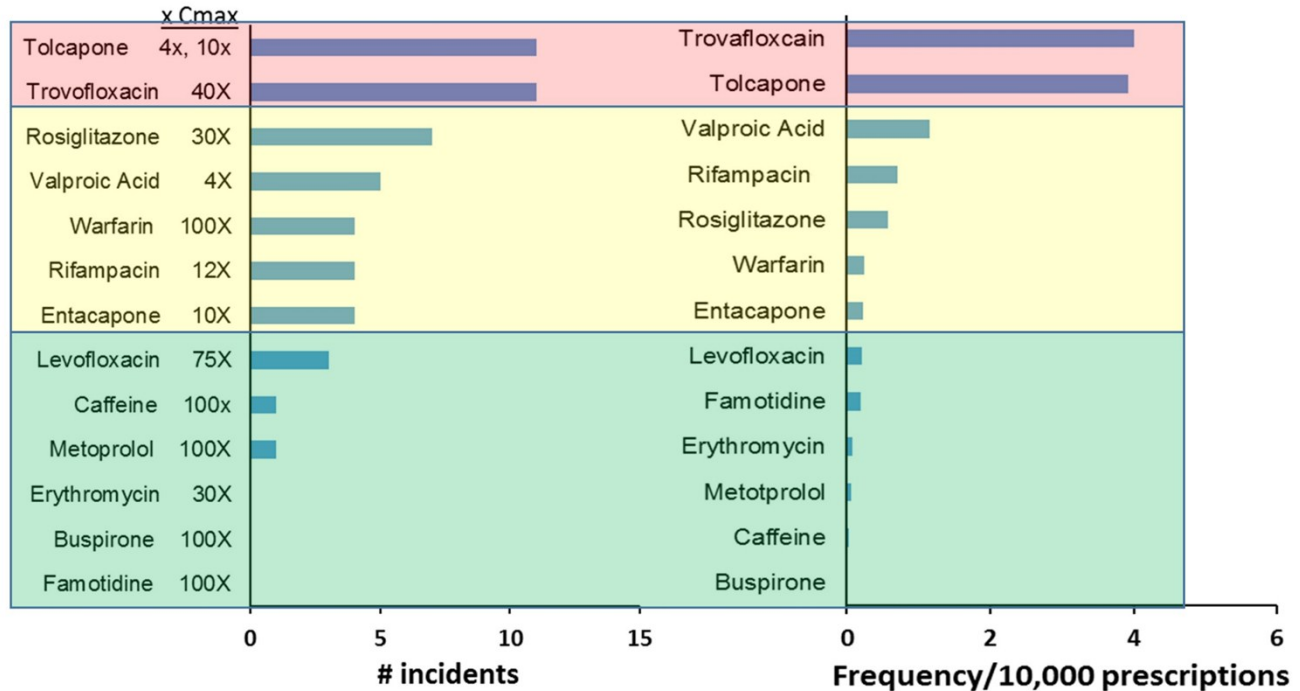

• Data from the FDA FAERS database

**Supplemental Figure S9.** Increasing Incidents of Adverse Responses in LAMPS and Tracked FAERS Data by Clinical Hepatotoxicity in the MPS-Db. Pink designates hepatotoxic compounds, yellow designates DILI compounds and green designate non liver toxic compounds. Although the absolute order varies slightly between the in vitro and clinical assessments of liver toxicity, the overall concordance can be accurately categorized.

**A.**

Reproducibility Status: **Excellent (ICC)**

Selection Parameters

|                           |                                                                                                                                                                                                                                                                                     |
|---------------------------|-------------------------------------------------------------------------------------------------------------------------------------------------------------------------------------------------------------------------------------------------------------------------------------|
| Target/Analyte            | Albumin                                                                                                                                                                                                                                                                             |
| Value Unit                | µg/day/10 <sup>6</sup> cells                                                                                                                                                                                                                                                        |
| Sample Location           | Effluent                                                                                                                                                                                                                                                                            |
| Compounds                 | No Compounds-                                                                                                                                                                                                                                                                       |
| Cells                     | endothelial (Human Vasculature) Chamber; hepatocyte (Human Liver) Chamber; monocyte (Human Immune) Chamber; stroma (Human Liver) Chamber;                                                                                                                                           |
| Items with Same Treatment | N0168, N0200, N0235, N0268, N0269, N0280, N0271, N0272, N0273, N0285, N0286                                                                                                                                                                                                         |
| Studies                   | EPA 1 (Taylor_EPA) Reproducibility Status: <b>Acceptable (ICC)</b><br>EPA 2 (Taylor_EPA) Reproducibility Status: <b>Acceptable (ICC)</b><br>EPA 3 (Taylor_EPA) Reproducibility Status: <b>Acceptable (ICC)</b><br>EPA 4 (Taylor_EPA) Reproducibility Status: <b>Excellent (ICC)</b> |

|               |              |        |               |                        |
|---------------|--------------|--------|---------------|------------------------|
| Interpolation | Max CV or CV | ICC    | ANOVA P-Value | Reproducibility Status |
| Trimmed       | 10.81        | 0.8245 |               | <b>Excellent (ICC)</b> |

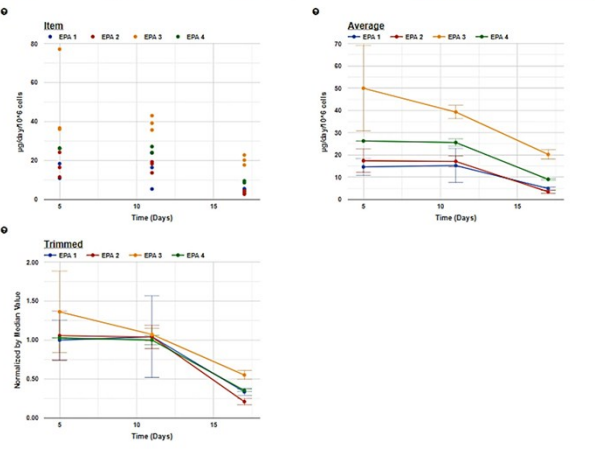

**B.**

Reproducibility Status: **Poor (ICC)**

Selection Parameters

|                           |                                                                                                                                                                                                                                                                             |
|---------------------------|-----------------------------------------------------------------------------------------------------------------------------------------------------------------------------------------------------------------------------------------------------------------------------|
| Target/Analyte            | Cytochrome C                                                                                                                                                                                                                                                                |
| Value Unit                | RFU                                                                                                                                                                                                                                                                         |
| Sample Location           | Chamber                                                                                                                                                                                                                                                                     |
| Compounds                 | No Compounds-                                                                                                                                                                                                                                                               |
| Cells                     | endothelial (Human Vasculature) Chamber; hepatocyte (Human Liver) Chamber; monocyte (Human Immune) Chamber; stroma (Human Liver) Chamber;                                                                                                                                   |
| Items with Same Treatment | N0168, N0200, N0235, N0268, N0269, N0280, N0271, N0272, N0273, N0285, N0286                                                                                                                                                                                                 |
| Studies                   | EPA 1 (Taylor_EPA) Reproducibility Status: <b>Poor (ICC)</b><br>EPA 2 (Taylor_EPA) Reproducibility Status: <b>Excellent (ICC)</b><br>EPA 3 (Taylor_EPA) Reproducibility Status: <b>Excellent (ICC)</b><br>EPA 4 (Taylor_EPA) Reproducibility Status: <b>Excellent (ICC)</b> |

|               |              |          |               |                        |
|---------------|--------------|----------|---------------|------------------------|
| Interpolation | Max CV or CV | ICC      | ANOVA P-Value | Reproducibility Status |
| Trimmed       | 100.7        | -0.01023 |               | <b>Poor (ICC)</b>      |

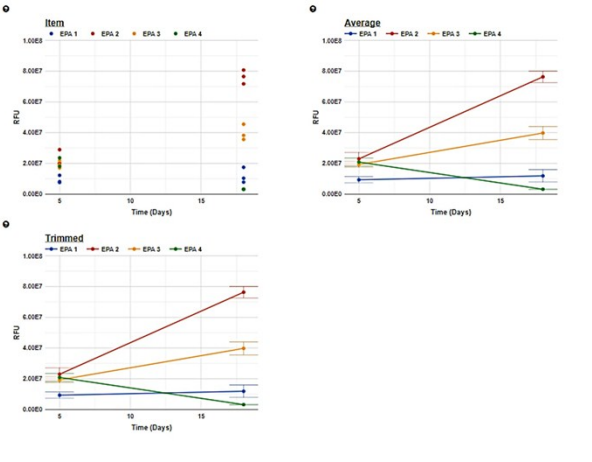

**Supplemental Figure S10: Detailed analysis of inter-study reproducibility assessment.** The detailed analysis shows the data used to calculate the inter-study reproducibility with links to the individual items (with same treatment) and the studies being compared. The intra-study reproducibility status is given for the samples in each of the studies being compared. The graphs show the individual data points for each of the samples (Items), the average value of the samples and a trimmed version of the average graph showing only the time points that overlapped between the studies. A) Albumin study to study reproducibility; and B) Cytochrome C study to study reproducibility.

| Show Details                        | Compounds                                                                                  | # of Chips | # of Time Points |
|-------------------------------------|--------------------------------------------------------------------------------------------|------------|------------------|
| <input checked="" type="checkbox"/> | -No Compounds-                                                                             | 3          | 3                |
| <input checked="" type="checkbox"/> | WARFARIN (90.0 µmol/L) Added on: D00 H00 M00; Duration of: D29 H00 M00; Added to: Influent | 2          | 3                |

Showing 1 to 5 of 5 entries

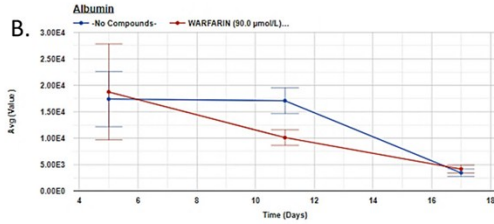

**C. Effect Size Methods**

- Cohen's d
- Glass's Δ
- Hedges' g
- Hedges' g'

**D. Significance Level (α)**

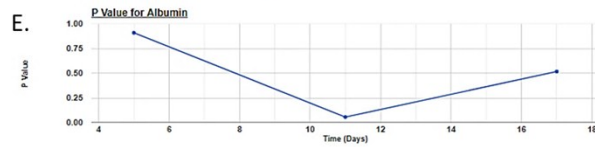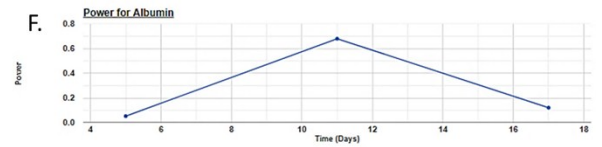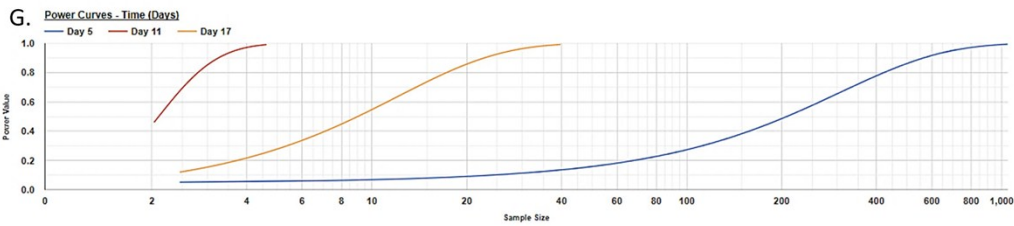

| Include                             | Time Points |
|-------------------------------------|-------------|
| <input checked="" type="checkbox"/> | 5           |
| <input checked="" type="checkbox"/> | 11          |
| <input checked="" type="checkbox"/> | 17          |

**Supplemental Figure S11. Additional information generated to assess the human MPS experimental model by Power Analysis.** In this example, the effect of warfarin on albumin secretion is being compared with the no compound control. The user selects the treatments to be analyzed (A) and a graph of the experimental data is generated (B). The user then selects the desired method of calculating the effect size (C, see Methods and Materials), the desired significance level (D), and runs the analysis. The p-values and the power values for the difference between the samples is plotted for each point on the data curve (E and F, respectively). Finally, a power curve is generated showing the required sample size to achieve different statistical power values for the given dataset (G). See Figure 6 for selecting the Target/Analyte to analyze, power estimates for different sample sizes and estimates for different sample sizes.

Disease Overview

Disease Biology

Clinical Data

Disease Models &amp; Studies

## Metastatic Breast Cancer Disease Biology

"Breast cancer is the leading cause of cancer death among women worldwide. The vast majority of breast cancers are carcinomas that originate from cells lining the milk-forming ducts of the mammary gland. The molecular subtypes of breast cancer, which are based on the presence or absence of hormone receptors (estrogen and progesterone subtypes) and human epidermal growth factor receptor-2 (HER2), include: hormone receptor positive and HER2 negative (luminal A subtype), hormone receptor positive and HER2 positive (luminal B subtype), hormone receptor negative and HER2 positive (HER2 positive), and hormone receptor negative and HER2 negative (basal-like or triple-negative breast cancers (TNBCs)). Hormone receptor positive breast cancers are largely driven by the estrogen/ER pathway. In HER2 positive breast tumours, HER2 activates the PI3K/AKT and the RAS/RAF/MAPK pathways, and stimulate cell growth, survival and differentiation. In patients suffering from TNBC, the deregulation of various signalling pathways (Notch and Wnt/beta-catenin), EGFR protein have been confirmed. In the case of breast cancer only 8% of all cancers are hereditary, a phenomenon linked to genetic changes in BRCA1 or BRCA2. Somatic mutations in only three genes (TP53, PIK3CA and GATA3) occurred at >10% incidence across all breast cancers."

Reference: KEGG Breast Cancer

## Metastatic Breast Cancer Genomic Resources

### Genomic Databases

| Name                                             | Description                                                                                                                                                                                                                                                                                                                                        |
|--------------------------------------------------|----------------------------------------------------------------------------------------------------------------------------------------------------------------------------------------------------------------------------------------------------------------------------------------------------------------------------------------------------|
| <a href="#">Gene Expression Omnibus</a>          | The Gene Expression Omnibus (GEO) is a public repository that archives and freely distributes comprehensive sets of microarray, next-generation sequencing, and other forms of high-throughput functional genomic data submitted by the scientific community. The disease biology portal delivers a prequeried link to the most relevant archives. |
| <a href="#">OMIM Gene-Phenotype Relationship</a> | OMIM is a comprehensive, authoritative compendium of human genes and genetic phenotypes with full-text, referenced overviews of all known Mendelian disorders. The disease biology portal delivers a curated query of the most relevant genes.                                                                                                     |
| <a href="#">DISEASES.org</a>                     | DISEASES is a weekly updated web resource that integrates evidence on disease-gene associations from automatic text mining, manually curated literature, cancer mutation data, and genome-wide association studies. The disease biology portal provides a query that displays disease relevant search results.                                     |

### KEGG: Metastatic Breast Cancer Disease Entry

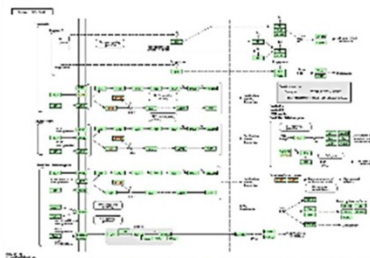

Click to view an interactive pathway map for Metastatic Breast Cancer.

## Proteomics, Metabolomics, and Pharmacogenomic Resources

### ProteomicsDB by SAP

ProteomicsDB by SAP is a proteomic database that allows you to browse proteins and chromosomes of interest.

### Metabolomicsworkbench

Metabolomicsworkbench serves as a national and international repository for metabolomics data.

### PharmaGKB

PharmaGKB is a website that investigates genetic variations and how the body

### DrugBank

DrugBank is a unique bioinformatics and cheminformatics database that combines

**Supplemental Figure S12. Disease Biology portal.** The [Disease Biology](#) portal allows the user to link to various genomic, proteomics, metabolomics, and pharmacogenomic databases. The links on this page are automatically pre-queried for the disease of interest.

## Metastatic Breast Cancer Clinical Data

[Disease Overview](#) [Disease Biology](#) [Clinical Data](#) [Disease Models & Studies](#)

[Copy](#) [CSV](#) [Print](#) [Column visibility](#)

Search:

Show **50** entries

| View                 | Drug Trial ID | Compound                                 | Species | Trial Type | Finding                     | Descriptor                | +/- | Frequency | Value | Value Units |
|----------------------|---------------|------------------------------------------|---------|------------|-----------------------------|---------------------------|-----|-----------|-------|-------------|
| <a href="#">View</a> | 225           | EVEROLIMUS 10.0 mg   Exemestane 25.0 mg  | Human   | Clinical   | All :: Other :: No Toxicity | Progression Free Survival | Pos |           |       |             |
| <a href="#">View</a> | 225           | Exemestane 25.0 mg                       | Human   | Clinical   | All :: Other :: No Toxicity | Progression Free Survival | Pos |           |       |             |
| <a href="#">View</a> | 227           | Fulvestrant 500.0 mg                     | Human   | Clinical   | All :: Other :: No Toxicity | Progression Free Survival | Pos |           |       |             |
| <a href="#">View</a> | 226           | LETROZOLE 2.5 mg                         | Human   | Clinical   | All :: Other :: No Toxicity | Progression Free Survival | Pos |           |       |             |
| <a href="#">View</a> | 226           | LETROZOLE 2.5 mg                         | Human   | Clinical   | All :: Other :: No Toxicity | Progression Free Survival | Pos |           |       |             |
| <a href="#">View</a> | 227           | Palbociclib 125.0   Fulvestrant 500.0 mg | Human   | Clinical   | All :: Other :: No Toxicity | Progression Free Survival | Pos |           |       |             |

Showing 1 to 6 of 6 entries

Previous **1** Next

[Review Completed Drug Trials](#)

**Supplemental Figure S13. Clinical Data portal.** The [Clinical Data](#) portal provides curated information on key drugs for the disease. Each of the drug entries here has a link to the original clinical study allowing for users to access more details of the study. The [Review Completed Drug Trials](#) button on the bottom queries ClinicalTrials.gov for the disease of interest and allows the user to view all the current and closed clinical trials of compounds for treating the disease where results have been reported.

## Metastatic Breast Cancer Disease Models & Studies

[Disease Overview](#) [Disease Biology](#) [Clinical Data](#) [Disease Models & Studies](#)

### Metastatic Breast Cancer Disease Models

Show MPS  Show EPA  Show TCTC  Show Unassigned

[Copy](#) [CSV](#) [Print](#) [Column visibility](#)

Search:  Show 100 entries

| View                 | Edit                 | Model Name                                      | Organ | Device                | Center                                            | Description                                                                                                                                                                                                                                                |
|----------------------|----------------------|-------------------------------------------------|-------|-----------------------|---------------------------------------------------|------------------------------------------------------------------------------------------------------------------------------------------------------------------------------------------------------------------------------------------------------------|
| <a href="#">View</a> | <a href="#">Edit</a> | LAMPS MCF7 Metastatic Breast Cancer Model       | Liver | Nortis Single Chamber | University of Pittsburgh Drug Discovery Institute | This model is the Nortis Device equivalent to the 96 MCF7 Metastatic Breast Cancer Co-Culture Model. It contains the 4-cell types from the LAMPS model with the addition of the various MCF7 mutant cells                                                  |
| <a href="#">View</a> | <a href="#">Edit</a> | LAMPS MCF7 Metastatic Breast Cancer Plate Model | Liver | 96 Well Plate         | University of Pittsburgh Drug Discovery Institute | In order to verify growth patterns in the LAMPS microfluidic model with the addition of MCF7 breast cancer mutant cells a static plate co-culture model consisting of the 4 cell types of the liver and the addition of the MCF7 mutant cells was created. |
| <a href="#">View</a> | <a href="#">Edit</a> | MCF7 Metastatic Breast Cancer Monoculture Model | Liver | 96 Well Plate         | University of Pittsburgh Drug Discovery Institute | Single MCF7 Mutant in a plate                                                                                                                                                                                                                              |

Showing 1 to 3 of 3 entries [Previous](#) [1](#) [Next](#)

### Studies Using Metastatic Breast Cancer Disease Models

[Copy](#) [CSV](#) [Print](#) [Column visibility](#)

Search:  Show 50 entries

| View/Edit                 | Study Name                                                                 | Start Date   | Study Types | MPS Models                                      | Data Points | Images | Creator        | Group      | Review |
|---------------------------|----------------------------------------------------------------------------|--------------|-------------|-------------------------------------------------|-------------|--------|----------------|------------|--------|
| <a href="#">View/Edit</a> | UPDDI-CC-2019-02-25-MBC 3D Relationship Between Hepatocytes and MCF7 Cells | Feb 25, 2019 | CC          | LAMPS MCF7 Metastatic Breast Cancer Model       | 0           | 0      | Dillon Gavlock | Taylor_MPS |        |
| <a href="#">View/Edit</a> | UPDDI-DM-2018-07-10-Effect of AZD9498 on growth of MCF7 Y537S Mutant Cells | Jul 10, 2018 | DM          | LAMPS MCF7 Metastatic Breast Cancer Model       | 56          | 0      | Dillon Gavlock | Taylor_MPS |        |
| <a href="#">View/Edit</a> | UPDDI-DM-2018-03-23-MCF7 Monoculture Plate Study 2                         | Mar 23, 2018 | DM          | MCF7 Metastatic Breast Cancer Monoculture Model | 114         | 72     | Dillon Gavlock | Taylor_MPS |        |

**Supplemental Figure S14. Disease Models & Studies portal.** The [Disease Models & Studies](#) portal provides a list of all in vitro experimental models and studies in the MPS-Db for the disease of interest. All of the information for the experimental models and studies is easily accessible through the View and View/Edit links.

### Tumor Cells (mCherry | RED)

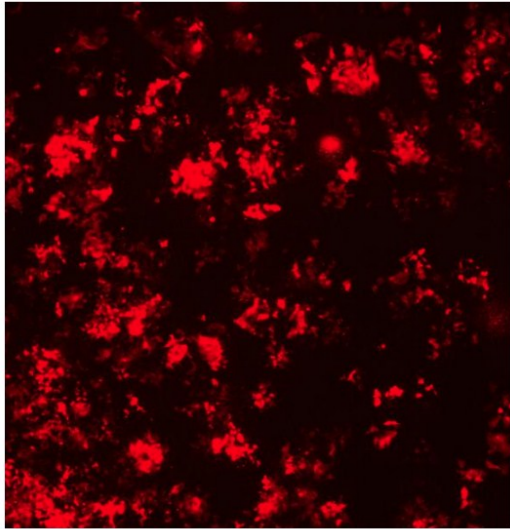

Note: This image may have been altered to assist with viewing.  
To perform analysis, please download the unaltered image.

|                             |                                                                    |
|-----------------------------|--------------------------------------------------------------------|
| Chip ID                     | N0341                                                              |
| Assay Plate ID              | none                                                               |
| Assay Well ID               | none                                                               |
| Time                        | D9 H0 M0                                                           |
| Method/Kit                  | Protein Fluorescence (mCherry)                                     |
| Target-Stain Pairings       | Tumor Cells (mCherry, red)                                         |
| Target/Analyte              | Tumor Cells                                                        |
| Sample Location             | Chamber                                                            |
| Notes                       | This is one in a time series of images showing cell proliferation. |
| Image File Name             | Y537S +E2 D9 B.tif                                                 |
| Image Field                 | 2                                                                  |
| Image Magnification         | 1.0x                                                               |
| Image Resolution            | 2.2 $\mu$ m                                                        |
| Image Sample Label          | mCherry                                                            |
| Image Wavelength (ex/em nm) | 587/610                                                            |
| Image Color Mapping         | red                                                                |
| Image Setting Note          |                                                                    |

**Supplemental Figure 15: Images and video data are also supported in the MPS-Db.** Day 9 growth of mCherry containing MCF7 Y537S cells in the MPS device. The metadata contains the information on device number, day of exposure, magnification and fluorescent wavelengths. Images can also be downloaded as tif files for additional analysis.

**Supplemental Table S1.** List of methods used to generate data for a variety of targets in different MPS organ models, which have been uploaded into the MPS-Db.

| Assay Category                       | Target                                                                         | Method/Kit                                                                       | Organ Models in MPS-Db |      |       |       |           |        |       |                 |      |             |                  |   |   |   |
|--------------------------------------|--------------------------------------------------------------------------------|----------------------------------------------------------------------------------|------------------------|------|-------|-------|-----------|--------|-------|-----------------|------|-------------|------------------|---|---|---|
|                                      |                                                                                |                                                                                  | Adipose                | Bone | Brain | Heart | Intestine | Kidney | Liver | Skeletal Muscle | Skin | Vasculature | Liver Metastasis |   |   |   |
| Cell morphology/function             | Beat Interval                                                                  | Microscopy Video Quantification (MotionGUI)                                      |                        |      |       | x     |           |        |       |                 |      |             |                  |   |   |   |
|                                      | Beat Rate                                                                      | EarlyTox Cardiotoxicity Kit, Microscopy Video Quantification (Manual, MotionGUI) |                        |      |       | x     |           |        |       |                 |      |             |                  |   |   |   |
|                                      | Bile Efflux                                                                    | Bile Efflux, Image Algorithm (UPDDI)                                             |                        |      |       |       |           |        |       |                 | x    |             |                  |   |   |   |
|                                      | Collagen                                                                       | Picosirius Red Stain Kit (Polysciences: 24901-250)                               | x                      |      |       |       |           |        |       |                 |      |             |                  |   |   |   |
|                                      | Contractile Force                                                              | Force Transducer (Thorlabs)                                                      |                        |      |       |       |           |        |       |                 |      | x           |                  |   |   |   |
|                                      | Contraction Velocity                                                           | Microscopy Video Quantification (MotionGUI)                                      |                        |      |       | x     |           |        |       |                 |      |             |                  |   |   |   |
|                                      | CYP3A4                                                                         | P450-Glo CYP3A4 Assays (Promega: V9001)                                          |                        |      |       |       |           |        |       |                 | x    |             |                  |   |   |   |
|                                      | Decay/Rise Ratio                                                               | EarlyTox Cardiotoxicity Kit (Molecular Devices: R8211)                           |                        |      |       | x     |           |        |       |                 |      |             |                  |   |   |   |
|                                      | Dextran-FITC (10kDa)                                                           | Fluorescence (490/525) (Sigma-Aldrich: FD10S)                                    |                        |      | x     |       | x         |        |       |                 |      |             |                  |   |   |   |
|                                      | E-Cadherin                                                                     | anti-E-Cadherin                                                                  |                        |      |       |       |           |        |       |                 | x    |             |                  |   |   |   |
|                                      | Fatty Acid                                                                     | BODIPY 500/510 C1, C12 (ThermoFisher: D3823)                                     | x                      |      |       |       |           |        |       |                 |      | x           |                  |   |   |   |
|                                      | Glucose Uptake                                                                 | Flow-through Biosensor B.LV5                                                     |                        |      |       |       |           |        |       |                 |      | x           |                  |   |   |   |
|                                      | Image                                                                          | ICC/IFC (DAPI, FITC, Cy5), Live imaging, Phase Contrast                          |                        |      |       |       |           |        |       |                 |      | x           |                  |   |   |   |
|                                      | Lipid Droplets, Lipid to Nuclei Ratio                                          | Lonza AdipoRed Assay Reagent (Lonza: PT-7009), Hoechst 33342                     | x                      |      |       |       |           |        |       |                 |      |             |                  |   |   |   |
|                                      | Maximum Elongation                                                             | Stimulation and Microscopy Video Quantification (1, 5, 10, or 20 Hz)             |                        |      |       |       |           |        |       |                 |      |             | x                |   |   |   |
|                                      | Neutral lipids                                                                 | BODIPY 493/503 (ThermoFisher: D3922)                                             | x                      |      |       |       |           |        |       |                 |      |             |                  |   |   |   |
|                                      | Relaxation Velocity                                                            | Microscopy Video Quantification (MotionGUI)                                      |                        |      |       | x     |           |        |       |                 |      |             |                  |   |   |   |
|                                      | Steatosis (macro and micro)                                                    | HCS LipidTOX Red Neutral Lipid Stain (Thermo: H34476)                            |                        |      |       |       |           |        |       |                 |      | x           |                  |   |   |   |
|                                      | Transepithelial Electrical Resistance                                          | EVOM2 Volt/Ohm Meter (WPI: 300523)                                               |                        |      |       |       | x         |        |       |                 |      |             |                  |   |   |   |
|                                      | Tumor Area, Intensity                                                          | Protein Fluorescence (DAPI, Texas Red) with Quantification (ImageJ, AngioTool)   |                        |      |       |       |           |        |       |                 |      |             |                  |   | x |   |
| Tumor Integrated Intensity           | mCherry 587/610                                                                |                                                                                  |                        |      |       |       |           |        |       |                 |      |             |                  |   | x |   |
| Vessel Area, Length, Junctions       | Protein Fluorescence (DAPI, Texas Red) with Quantification (ImageJ, AngioTool) |                                                                                  |                        |      |       |       |           |        |       |                 |      |             |                  | x |   |   |
| Cell viability/proliferaton/toxicity | Cell Viability (Quantitative)                                                  | CellTiter-Glo Luminescent Cell Viability Assay (Promega: G7573)                  |                        |      |       |       | x         |        |       | x               |      |             |                  | x |   |   |
|                                      | Cellular Metabolism                                                            | MTT Assay Kits                                                                   |                        |      |       |       |           |        |       |                 | x    |             |                  | x |   |   |
|                                      | Lactate Dehydrogenase                                                          | Multiple commercial kits                                                         | x                      | x    | x     |       |           |        | x     | x               |      |             |                  | x |   |   |
|                                      | Live Cells / Dead Cells                                                        | LIVE/DEAD Cell Imaging Kits                                                      | x                      |      |       |       |           |        | x     | x               |      |             |                  |   |   |   |
|                                      | Mitochondria                                                                   | Fluorescence (490/525)                                                           |                        |      |       |       |           |        |       |                 | x    |             |                  |   |   |   |
|                                      | PrestoBlue                                                                     | PrestoBlue Cell Viability (ThermoFisher: A13261, A13262)                         | x                      | x    | x     |       |           |        | x     | x               |      |             |                  | x |   |   |
|                                      | Tumor Growth                                                                   | Cell Proliferation Kit II (XTT) (Sigma: 11465015001)                             |                        |      |       |       |           |        |       |                 |      |             |                  |   | x |   |
|                                      | WST-1                                                                          | WST-1 Assay Reagent - Cell Proliferation (ready to use) (ab155902)               |                        |      |       |       |           |        |       |                 |      |             |                  |   |   | x |
| Compound Level                       | User define compound(s) of interest                                            | RapidFire-MS, HPLC-MS, LC-MS/MS, ICP-MS, IM/MS                                   |                        | x    | x     | x     | x         | x      | x     | x               |      |             | x                |   |   |   |
| Device Characterization              | Flowrate                                                                       | Flowrate (by setting, volume, or weight)                                         |                        |      |       |       |           |        |       | x               | x    |             |                  |   |   |   |
| Gene Expression                      | User defined gene(s) of interest                                               | RT-PCR (Applied Biosystems: StepOnePlus and SYBR Green Reaction Mix)             |                        | x    |       |       |           |        |       |                 |      |             |                  |   |   |   |
| Intracellular Biosensor              | Cytochrome C                                                                   | CytC Biosensor, Image Algorithm                                                  |                        |      |       |       |           |        |       |                 | x    |             |                  |   |   |   |
|                                      | GCaMP6                                                                         | Live Imaging Algorithm (FITC)                                                    |                        |      |       |       |           |        |       |                 |      | x           |                  |   |   |   |
| Protein Binding                      | Luciferase Expression                                                          | ONE-Glo Luciferase Assay System (Promega: E6110, E6120, E6130)                   |                        | x    |       |       |           |        |       |                 |      |             |                  |   |   |   |
|                                      | User defined compound of interest                                              | Single-Use RED Plate with Inserts (Thermo Scientific: 2034.6) and ICP-MS         |                        | x    |       |       |           |        |       | x               | x    |             |                  |   |   |   |
| Secreted Protein/Compound            | Alpha-fetoprotein                                                              | Human alpha-Fetoprotein DuoSet (R&D Systems: DY1369)                             |                        |      |       |       |           |        |       |                 | x    |             |                  |   |   |   |
|                                      | Ammonium                                                                       | Ammonia Assay Kit (abcam: ab83360)                                               |                        |      |       |       |           |        |       | x               |      |             |                  |   |   |   |
|                                      | Blood Urea Nitrogen                                                            | BUN Liquid Reagent (Stanbio Laboratory: SB-0580-250)                             |                        |      |       |       |           |        |       |                 |      | x           |                  |   |   |   |
|                                      | Glucose                                                                        | Amplex Red Glucose/Glucose Oxidase Assay Kit, Flow-through Biosensor B.LV5       |                        |      |       |       |           |        |       |                 |      | x           |                  |   |   |   |
|                                      | Insulin Secretion                                                              | Insulin ELISA                                                                    |                        |      |       |       |           |        |       |                 |      |             | x                |   |   |   |
|                                      | L-lactate                                                                      | Flow-through Biosensor B.LV5                                                     |                        |      |       |       |           |        |       |                 |      |             | x                |   |   |   |
|                                      | User define protein(s) of interest                                             | Human ELISA Kits from various vendors                                            | x                      | x    | x     |       | x         | x      | x     |                 |      |             |                  |   |   |   |
|                                      | User define protein(s) of interest                                             | Meso Scale Discovery Assay kits and V-PLEX panels                                |                        | x    | x     | x     |           | x      |       |                 |      |             |                  |   |   |   |
